# Supplementary material for: Maple and hickory leaf litter fungal communities reflect pre-senescent leaf communities
Source: PubMed Central journal article supplement (PMC8801177; doi:10.7717/peerj.12701), 2022-01-27
Supplement: peerj-10-12701-s008.pdf [file peerj-10-12701-s008.pdf]

Color Key

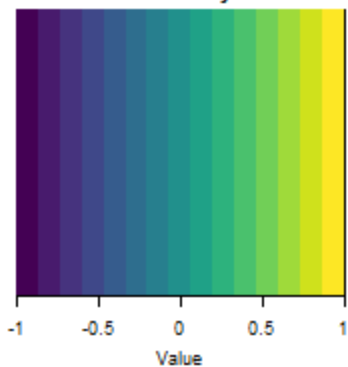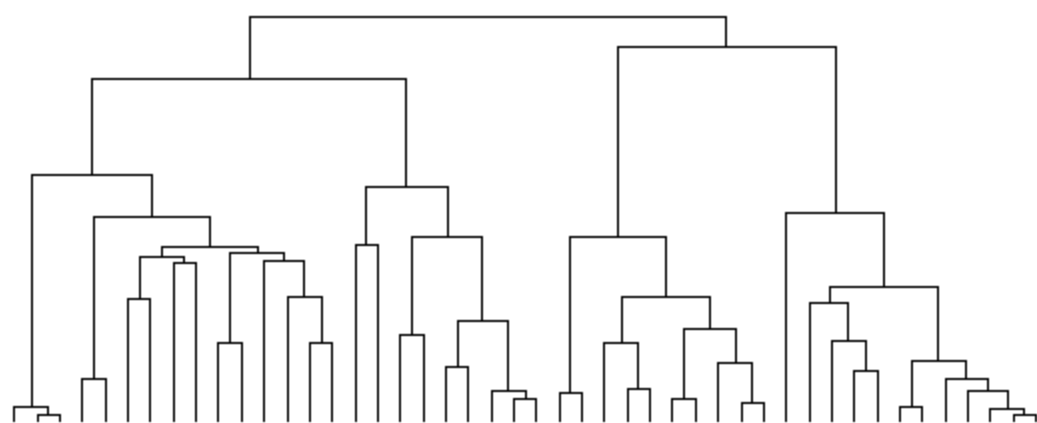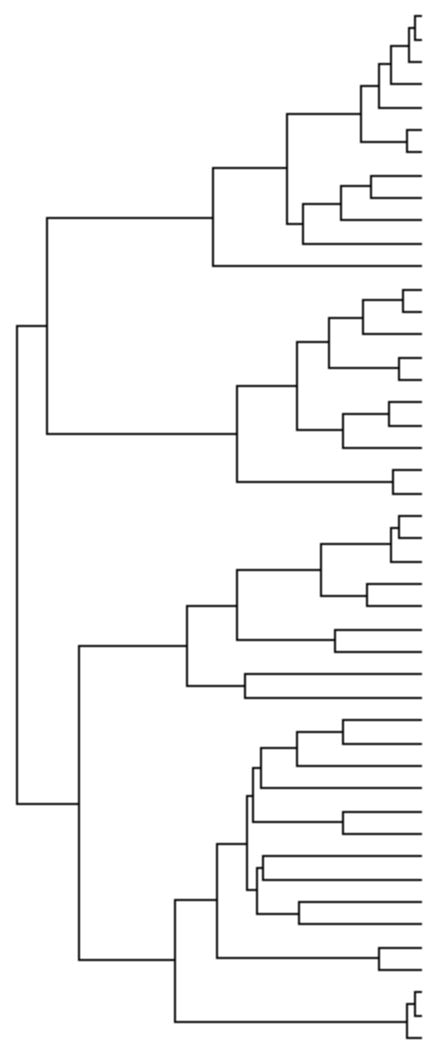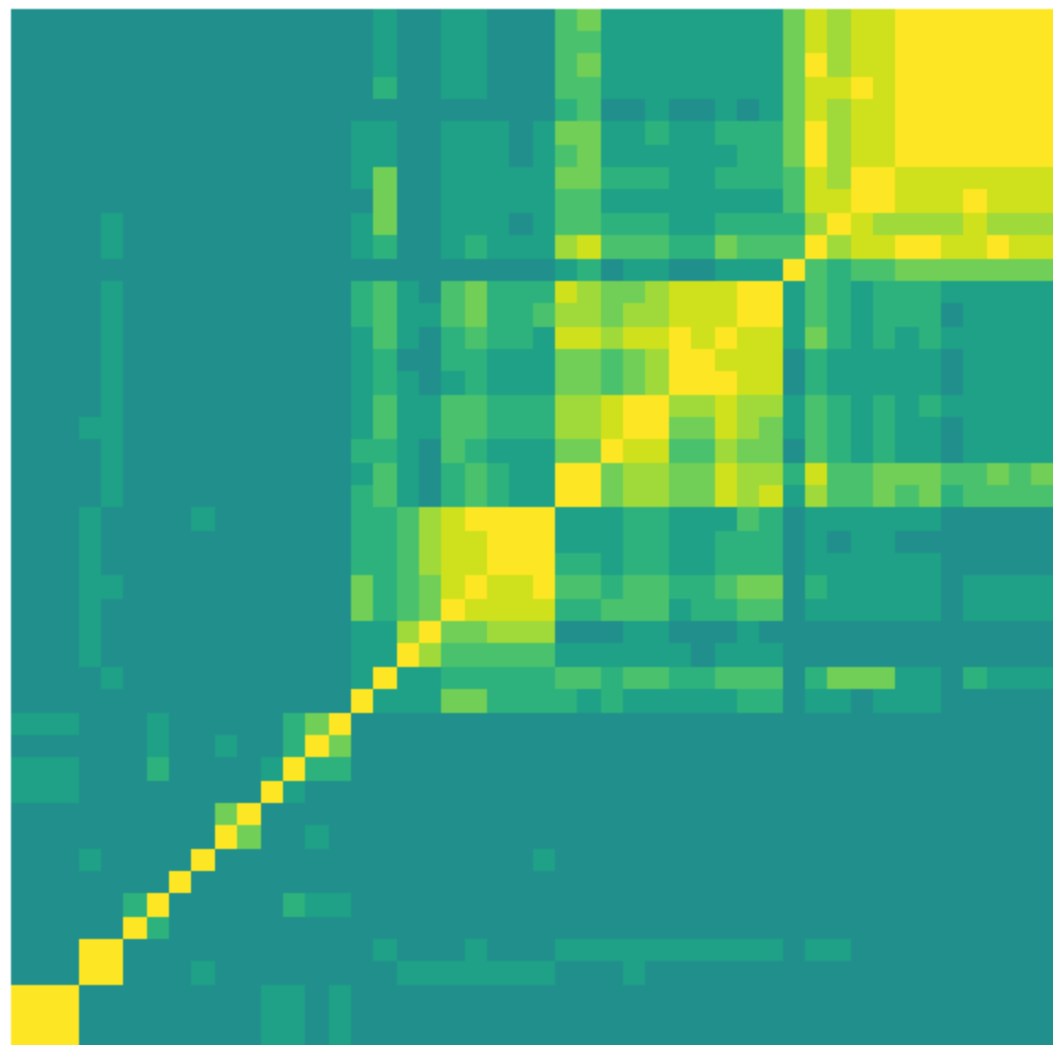

C-4-Soil  
A-5-Soil  
C-5-Soil  
A-1-Litter  
A-4-Litter  
A-2-Litter  
A-1-Soil  
A-5-Litter  
A-3-Litter  
A-2-Soil  
C-2-Soil  
A-3-Soil  
C-1-Soil  
C-3-Soil  
A-4-Soil  
C-3-Leaf  
A-1-Leaf  
C-1-Litter  
C-2-Litter  
C-3-Litter  
C-4-Litter  
C-1-Leaf  
C-2-Leaf  
C-5-Litter  
Leaf swab-Cot  
Leaf swab-Syn  
Leaf swab-Cot  
Leaf swab-Cot  
Leaf swab-Cot  
Leaf swab-Syn  
Leaf swab-Syn  
Leaf swab-Cot  
Leaf swab-Cot  
Leaf swab-Cot  
Leaf swab-Syn  
Leaf swab-Syn  
Leaf swab-Cot  
A-5-Leaf  
A-3-Leaf  
A-2-Leaf  
Leaf swab-Syn  
Leaf swab-Syn  
Leaf swab-Syn  
A-4-Leaf  
Leaf swab-Cot  
Leaf swab-Cot  
Leaf swab-Syn

A-5-Leaf swab  
A-5-Leaf swab  
A-4-Leaf swab  
A-4-Leaf  
A-2-Leaf swab  
C-3-Leaf swab  
A-3-Leaf swab  
A-2-Leaf  
A-3-Leaf  
A-5-Leaf  
A-2-Leaf swab  
A-4-Leaf swab  
C-5-Leaf swab  
C-5-Leaf swab  
C-1-Leaf swab  
C-4-Leaf swab  
C-1-Leaf swab  
C-2-Leaf swab  
C-2-Leaf swab  
C-3-Leaf swab  
A-1-Leaf swab  
A-1-Leaf swab  
C-5-Litter  
C-2-Leaf  
C-1-Leaf  
C-4-Litter  
C-3-Litter  
C-2-Litter  
C-1-Litter  
A-1-Leaf  
C-3-Leaf  
A-4-Soil  
C-3-Soil  
C-1-Soil  
A-3-Soil  
C-2-Soil  
A-2-Soil  
A-3-Litter  
A-5-Litter  
A-1-Soil  
A-2-Litter  
A-4-Litter  
A-1-Litter  
C-5-Soil  
A-5-Soil  
C-4-Soil
