# Supplementary material for: Maple and hickory leaf litter fungal communities reflect pre-senescent leaf communities
Source: PubMed Central journal article supplement (PMC8801177; doi:10.7717/peerj.12701), 2022-01-27

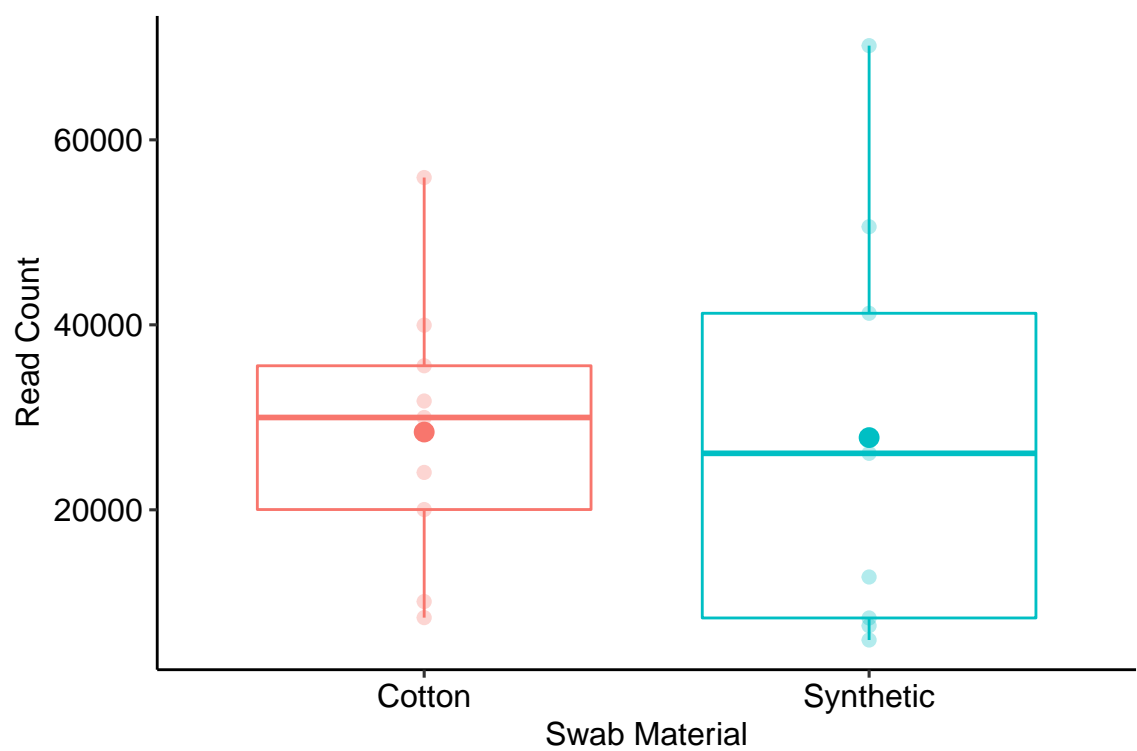

Supplement: peerj-10-12701-s009.pdf [file peerj-10-12701-s009.pdf]
